# Supplementary material
Source: PubMed Central journal article supplement (PMC6601098)
Supplement: 2018_199646-Disclosures_and_Contributions.pdf [file 2018_199646-Disclosures_and_Contributions.pdf]

Haematologica  
HAEMATOL/2018/199646  
Version 4

A confirmation of chronic graft-versus-host disease prediction using  
allogeneic HY antibodies following sex-mismatched hematopoietic cell  
transplantation

Jed Paul, Hideki Nakasone, Bitá Sahaf, Fang Wu, Kathy Wang, Vincent  
Ho, Juan Wu, Haesook Kim, Bruce R. Blazar, Jerome Ritz, Alan  
Howard, Corey Cutler, and David Miklos

Disclosures: 1. This work was supported by National Institutes of Health, National Cancer Institute grants P01CA142106, CA183559, and CA183560, as well as by an ancillary laboratory study award provided by the Blood and Marrow Transplant Clinical Trials Network and the National Heart, Lung and Blood Institute and the National Cancer Institute (#U10HL069294). Hideki Nakasone was a recipient of a grant from Takeda Science Foundation. 2. No authors had financial relationships with commercial entities for this study. 3. There are no patents related to this work.

Contributions: BS, and FW performed research, JP and HN performed data analysis, JP wrote the manuscript, KW, VH, JW, HK, BB, JR, AH, and CC aided in sample collection, trial oversight, and data organization. DM, JR, AH, and CC supervised the study.
